# Supplementary material
Source: publisher figshare collection journal article supplement (https://gsajournals.figshare.com/ndownloader/files/13687637)
Supplement: Supplementary file 1 [file 13687637]

**Table S10:** **Mitochondrial genotype-dependent spot dilution phenotypes in eight iso-nuclear F1 pairs from 12 genetic backgrounds**.

| Background | Oli | *ATP6* |  | Background | Oli | *ATP6* | mitochondrial genotype-dependent phenotype(s) in iso-nuclear F1 |
| --- | --- | --- | --- | --- | --- | --- | --- |
| YJM145 | 0.75 | S | × | YJM1552 | 1.46 | R | Oli, Cyh |
| YJM1083 | 0 | S | × | YJM627 | 1.09 | S | Oli (T), Myx (T), Spi |
| YJM1083 | 0 | S | × | YJM1418 | 1.36 | R | Oli, Mtx, Spi (T), Ery, YPE (15º, 39º), Cu (T), YPD (39º) |
| YJM1242 | 0 | S | × | YJM1443 | 1.05 | S | Oli, Myx, Mtx, Spi (T), Chl, EtBr, Ant, Cu, YPD (15º) |
| YJM1242 | 0 | S | × | YJM1552 | 1.46 | R | Oli, Myx, Spi (T), YPE (39º), Ant, EtBr, Ery, Chl, Ket |
| YJM1244 | 0 | S | × | YJM693 | 1.05 | S | Spi, YPE (39º) |
| YJM1342 | 0 | S | × | YJM195 | 1.44 | R | Oli |
| YJM1342 | 0 | S | × | YJM1252 | 1.09 | S |  |
